# Supplementary material for: Cooperative regulation of Zhx1 and hnRNPA1 drives the cardiac progenitor-specific transcriptional activation during cardiomyocyte differentiation
Source: PubMed Central journal article supplement (PMC10349095; doi:10.1038/s41420-023-01548-1), 2023-07-14

---

**Supplemental Data**

**Original western blots**

Figure 1F. Anti-ZHX1

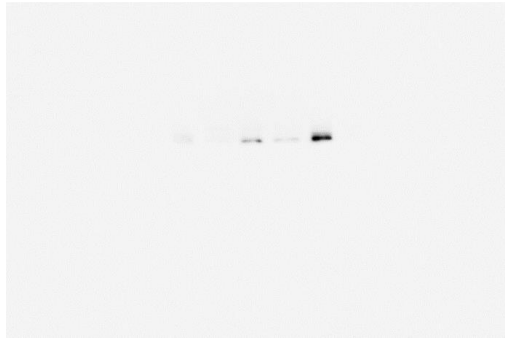

Figure 1F. Anti-GAPDH

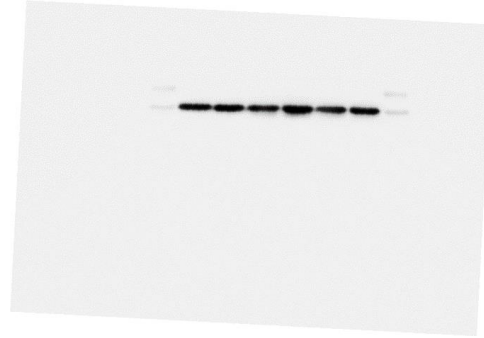

---

Figure 1H. Anti-cTNT

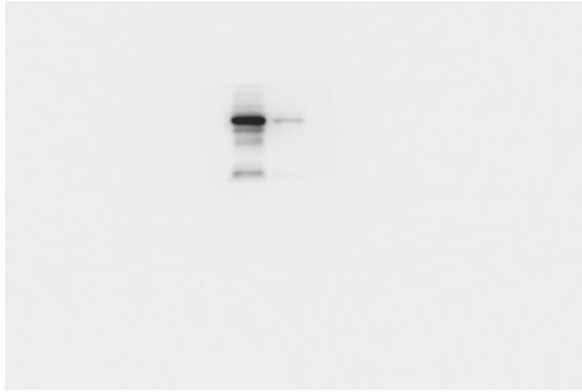

Figure 1H. Anti- $\alpha$ -ACTININ

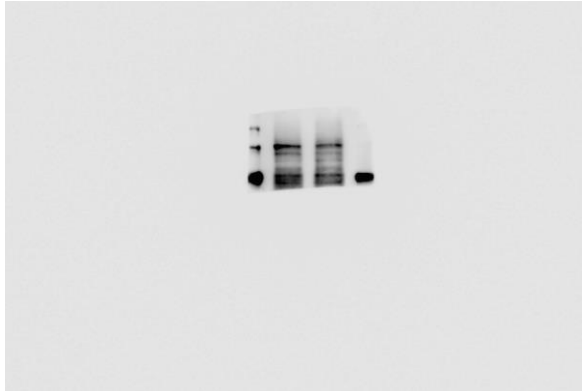

Figure 1H. Anti-GAPDH

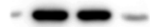

---

Figure 2B. Anti-ZHX1

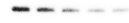

Figure 2B. Anti-GAPDH

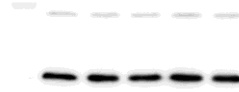

Figure 2E. Anti-ZHX1 D2

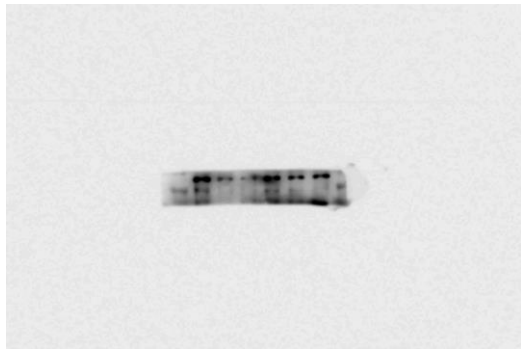

Figure 2E. Anti-GAPDH D2

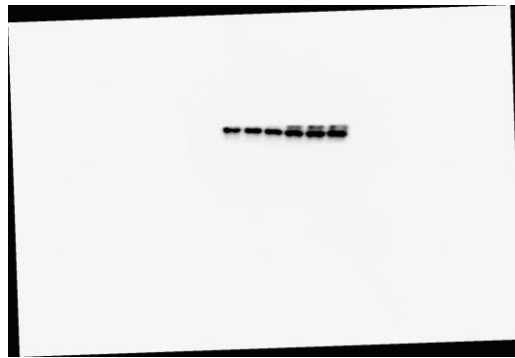

Figure 2E. Anti-ZHX1 D4

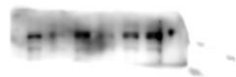

Figure 2E. Anti-GAPDH D4

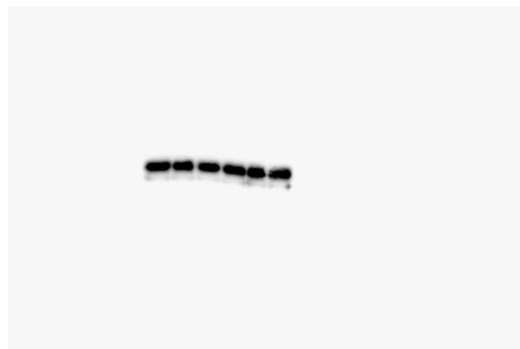

---

Figure 2E. Anti-ZHX1 D6

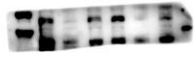

Figure 2E. Anti-GAPDH D6

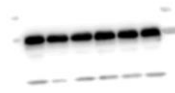

Figure 2E. Anti-ZHX1 D8

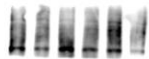

Figure 2E. Anti-GAPDH D8

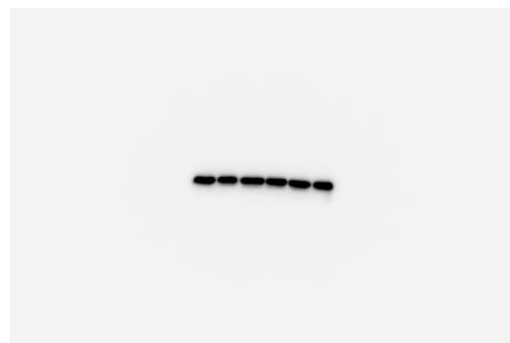

Figure 2G. Anti-cTNT

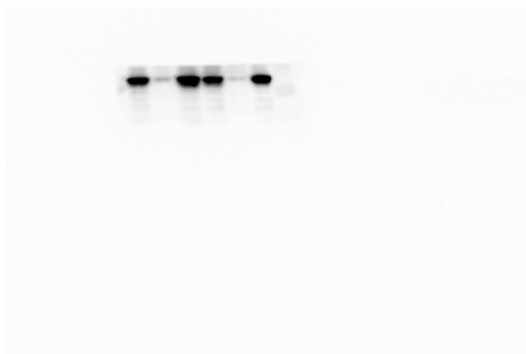

Figure 2G. Anti- $\alpha$ -ACTININ

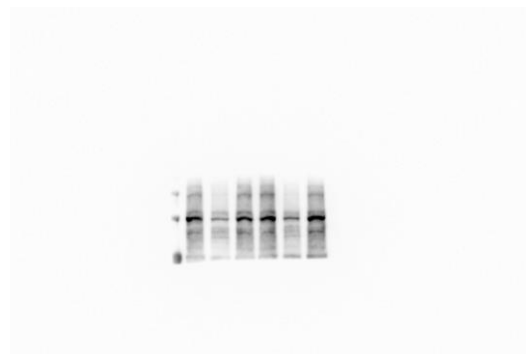

Figure 2G. Anti-GAPDH

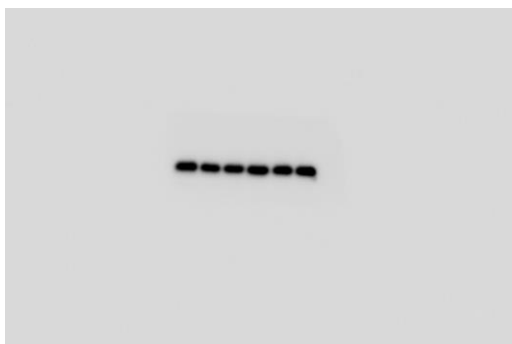

---

Figure 3C. Anti-ZHX1

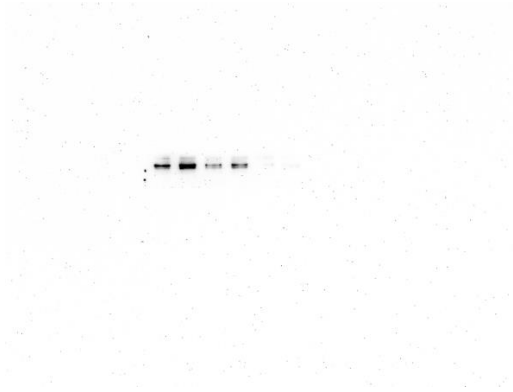

Figure 3C. Anti-GAPDH

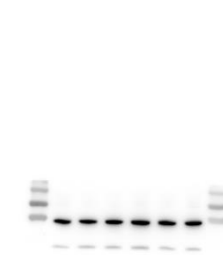

Figure 3J. Anti-cTNT

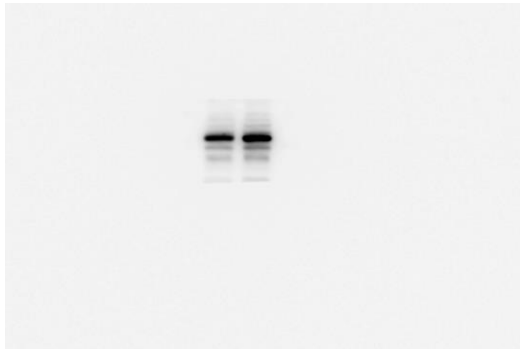

Figure 3J. Anti- $\alpha$ -ACTININ

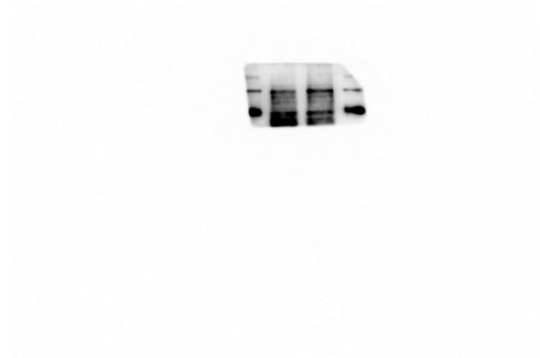

Figure 3J. Anti-GAPDH

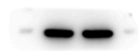

---

Figure 4B. Anti-FLAG

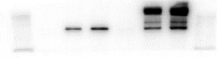

Figure 4B. Anti-HA

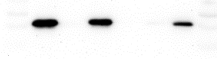

Figure 4B. Anti-FLAG

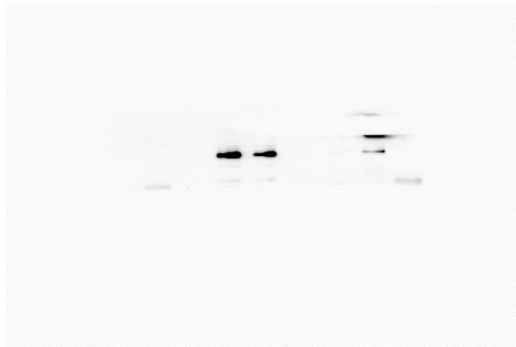

Figure 4B. Anti-HA

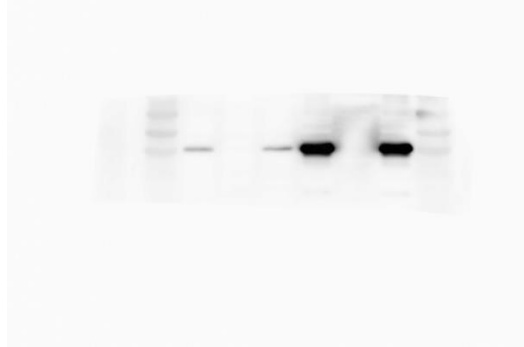

---

Figure 5B. Input: Anti-Flag

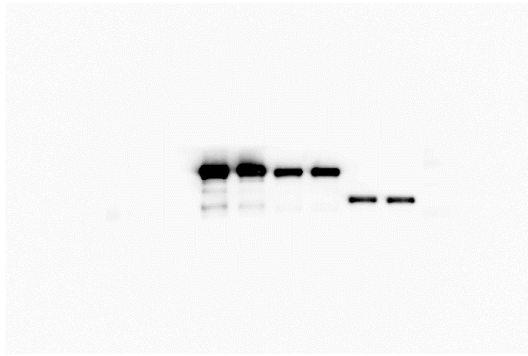

Figure 5B. Input: Anti-HA

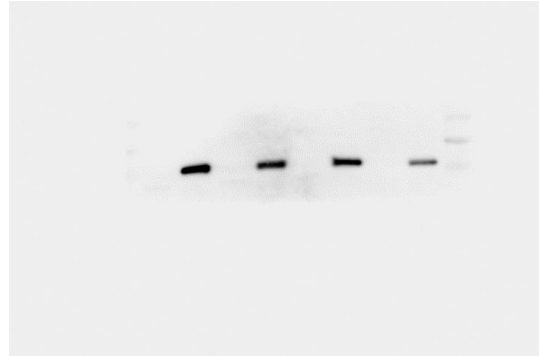

Figure 5B. IP: Anti-Flag

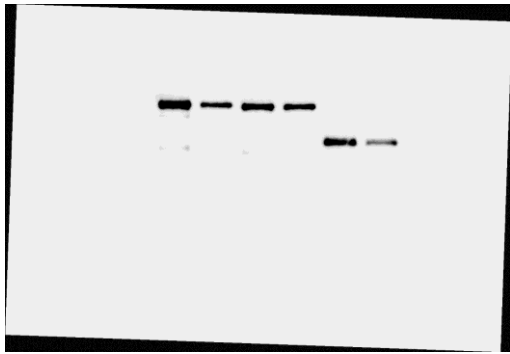

Figure 5B. IP: Anti-HA

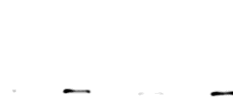

---

Figure 5D. Input: Anti-HA

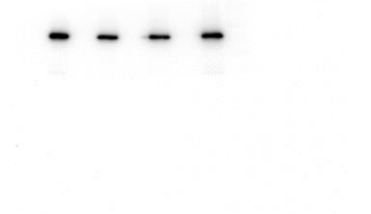

Figure 5D. Input: Anti-Flag

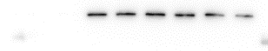

Figure 5D. IP: Anti-HA

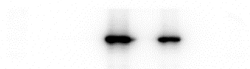

Figure 5D. IP: Anti-Flag

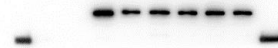



---

Figure 5E. Input: Anti-Flag

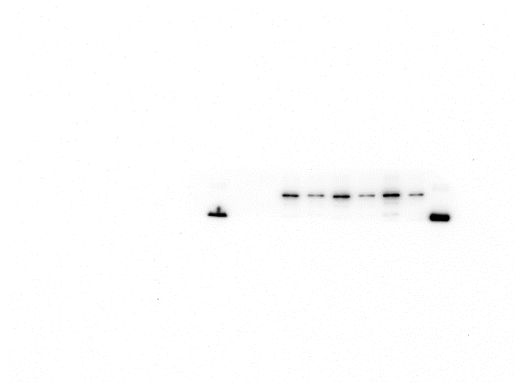

Figure 5E. Input: Anti-HA

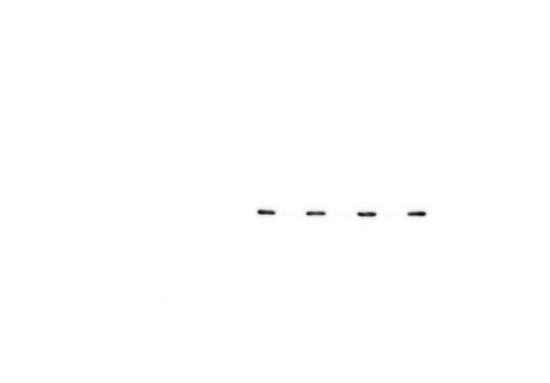

Figure 5E. IP: Anti-Flag

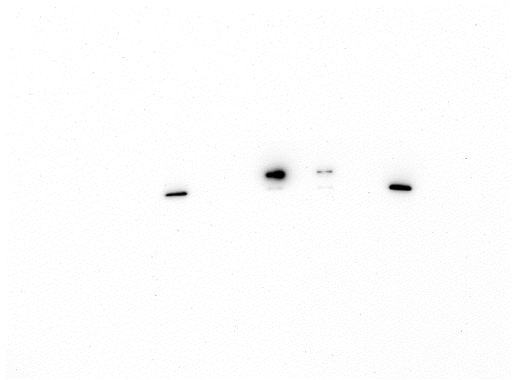

Figure 5E. IP: Anti-HA

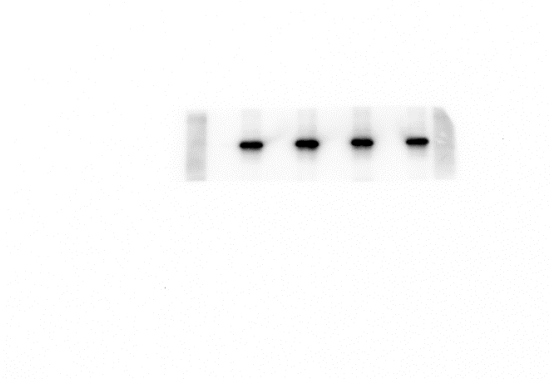

---

Figure 5G. Input: Anti-Flag

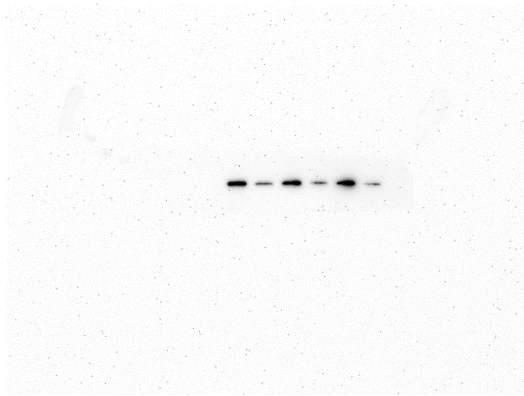

Figure 5G. Input: Anti-HA

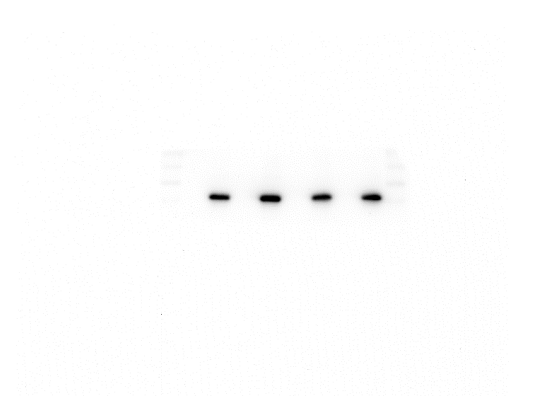

Figure 5G. IP: Anti-Flag

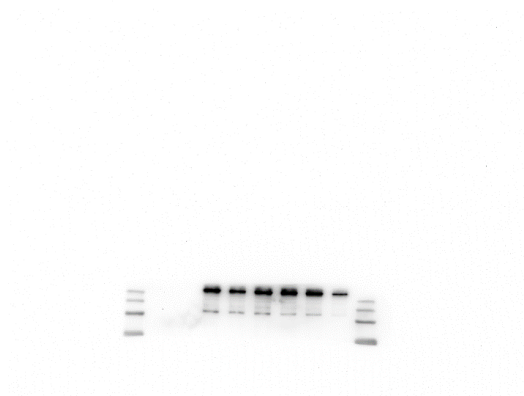

Figure 5G. IP: Anti-HA

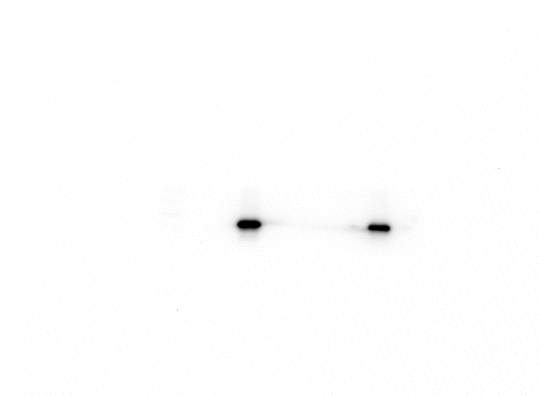

---

Figure 5H. Input: Anti-Flag

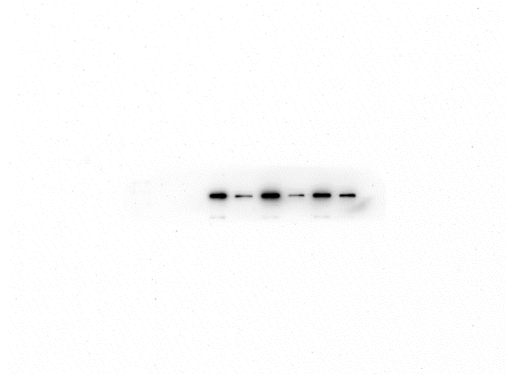

Figure 5H. Input: Anti-HA

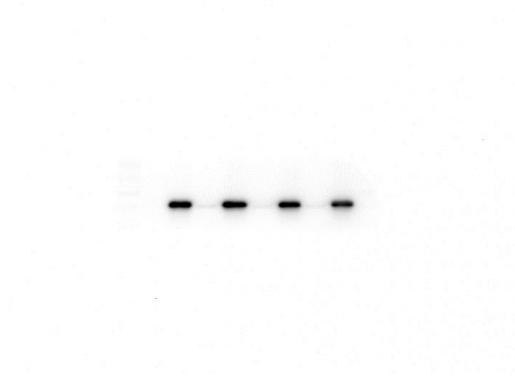

Figure 5H. IP: Anti-Flag

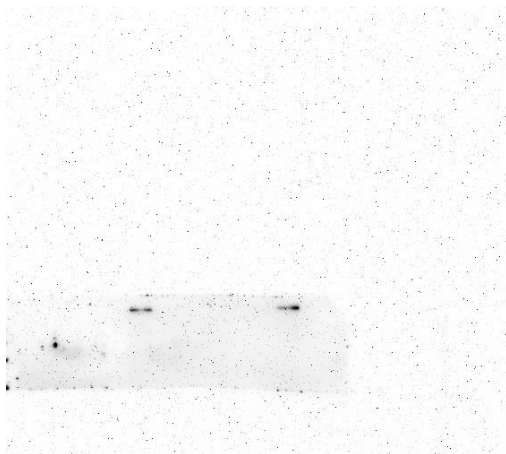

Figure 5H. IP: Anti-HA

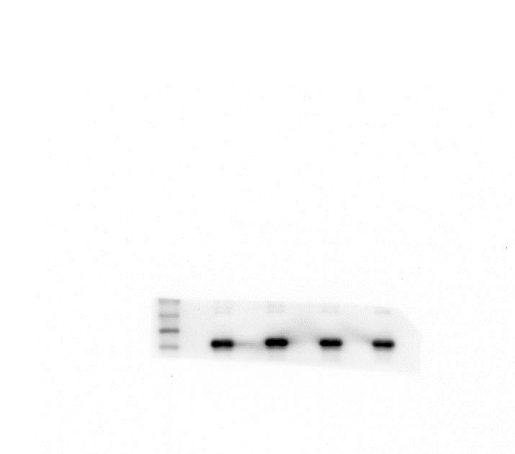

---

Figure 6B. Anti-ZHX1

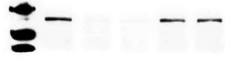

Figure 6B. Anti-GAPDH

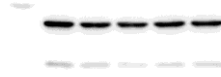

Figure 6E. Anti-cTNT

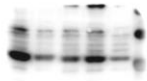

Figure 6E. Anti- $\alpha$ -ACTININ

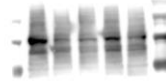

Figure 6E. Anti-GAPDH

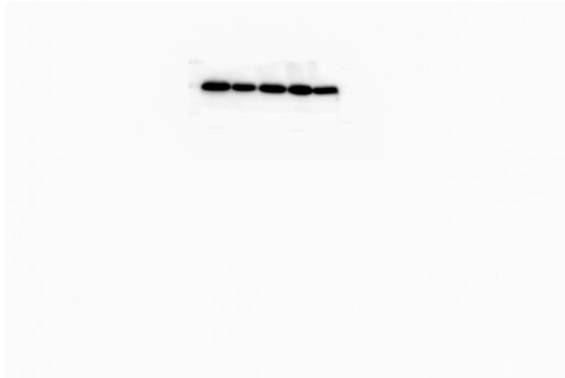

---

Figure S3A. Anti-ZHX1

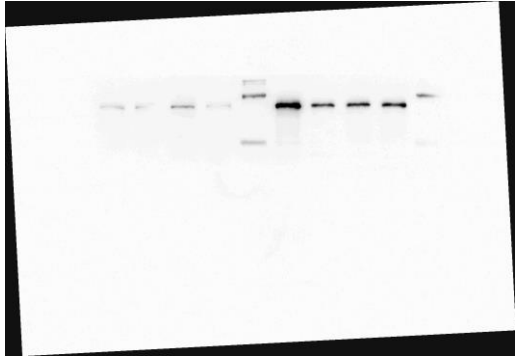

Figure S3A. Anti-GAPDH

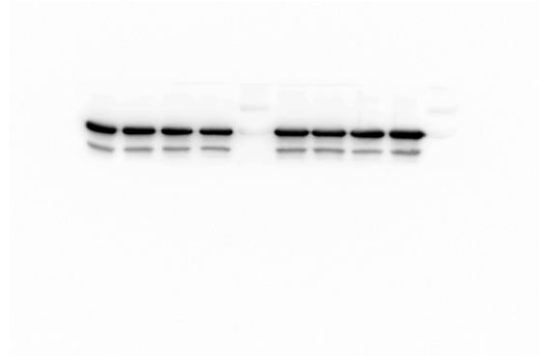

Figure S3C. Anti-CTNT

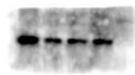

Figure S3C. Anti- $\alpha$ -ACTININ

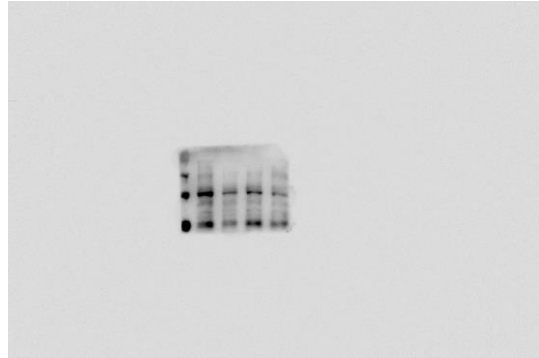

Figure S3C. Anti-GAPDH

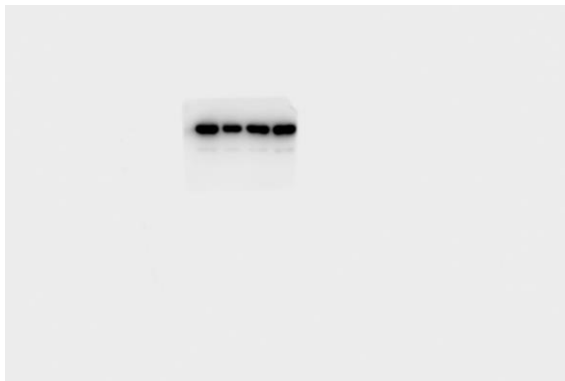

---

Figure S6C. Anti-P-Smad2/3 D4

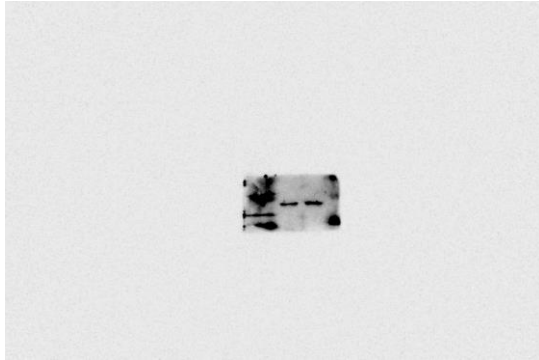

Figure S6C. Anti- Smad2/3 D4

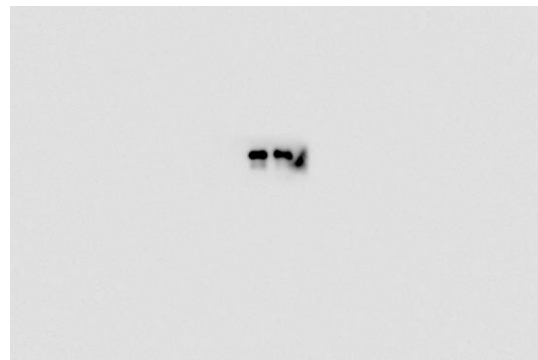

Figure S6C. Anti-Active  $\beta$ -Catenin D4

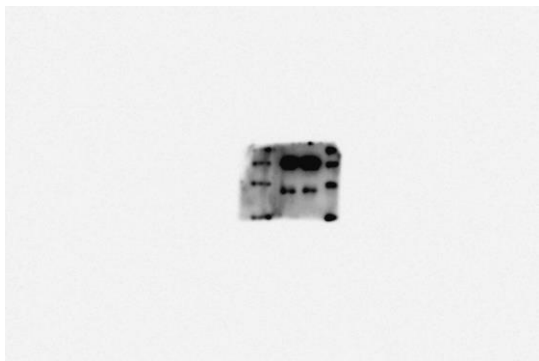

Figure S6C. Anti-Total  $\beta$ -Catenin D4

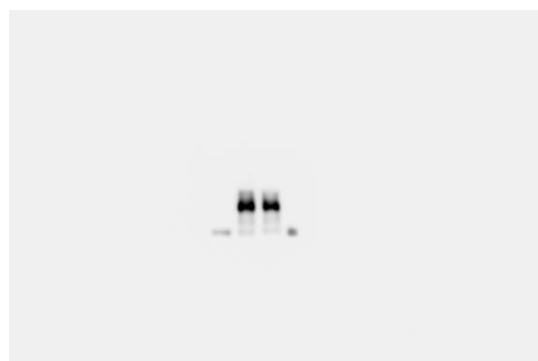

Figure S6C. Anti-GAPDH D4

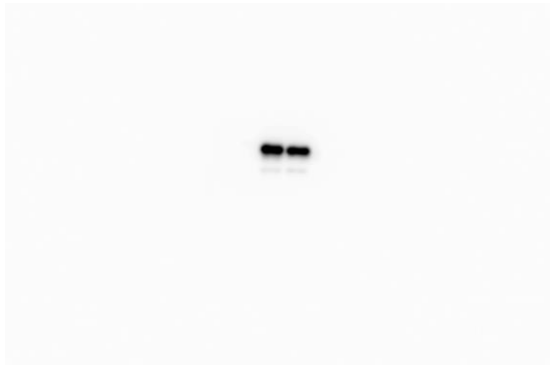

---

Figure S6C. Anti-P-Smad2/3 D6

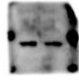

Figure S6C. Anti- Smad2/3 D6

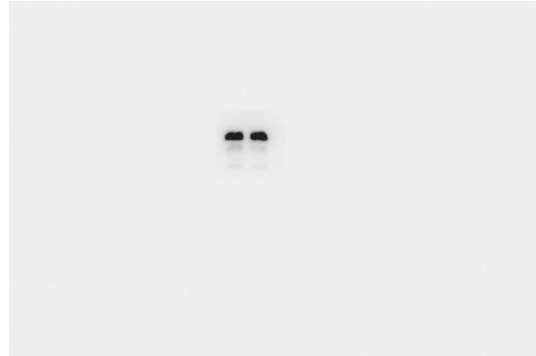

Figure S6C. Anti-Active  $\beta$ -Catenin D6

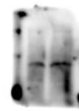

Figure S6C. Anti-Total  $\beta$ -Catenin D6

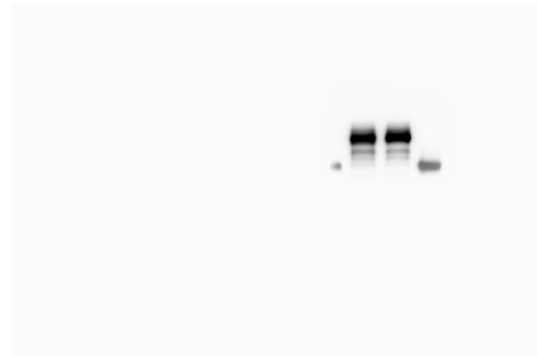

Figure S6C. Anti-GAPDH D6

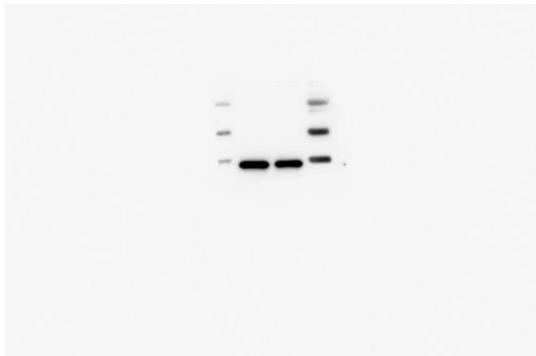

---

Figure S6D. Anti-P-Smad2/3 D4

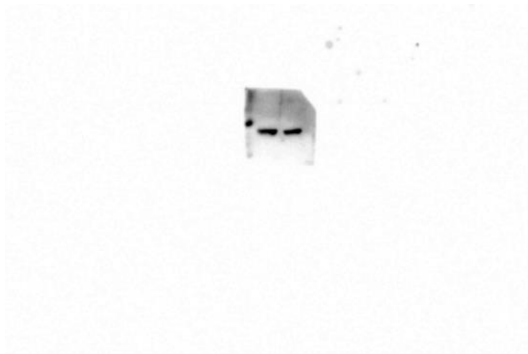

Figure S6D. Anti-Smad2/3 D4

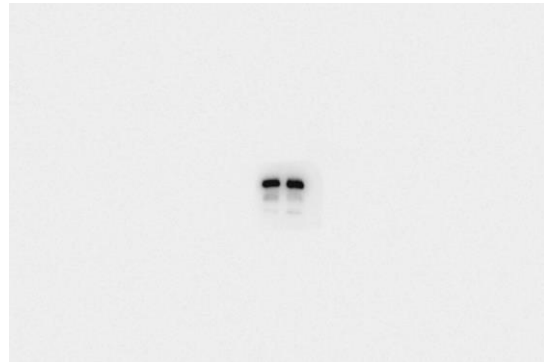

Figure S6D. Anti-Active  $\beta$ -Catenin D4

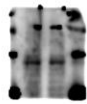

Figure S6D. Anti-Total  $\beta$ -Catenin D4

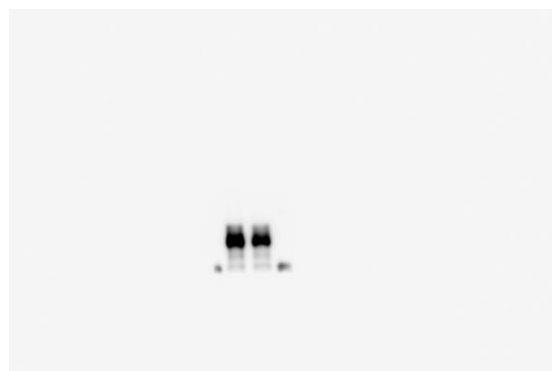

Figure S6D. Anti-GAPDH D4

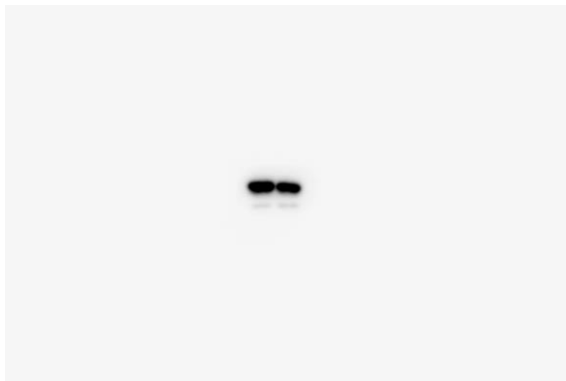



---

Figure S6D. Anti-P-Smad2/3 D6

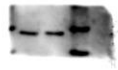

Figure S6D. Anti- Smad2/3 D6

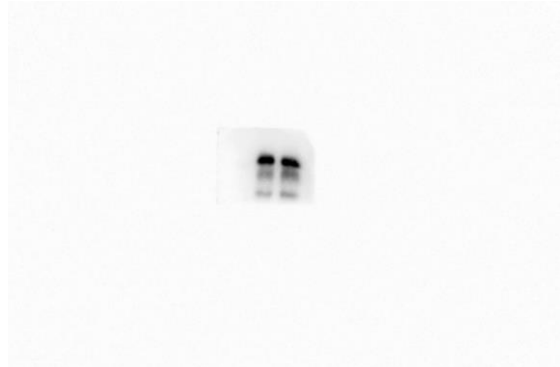

Figure S6D. Anti-Active  $\beta$ -Catenin D6

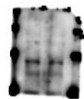

Figure S6D. Anti-Total  $\beta$ -Catenin D6

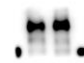

Figure S6D. Anti-GAPDH D6

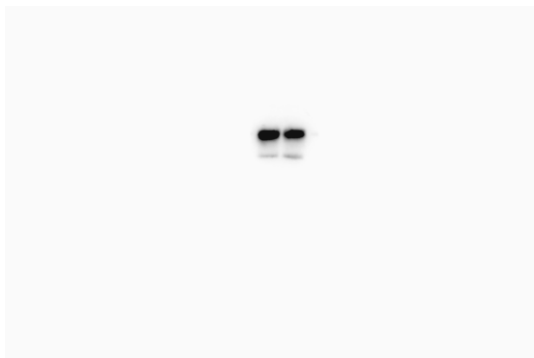

Supplement: 41420_2023_1548_MOESM2_ESM.pdf [file 41420_2023_1548_MOESM2_ESM.pdf]
