# Supplementary material for: Cooperative regulation of Zhx1 and hnRNPA1 drives the cardiac progenitor-specific transcriptional activation during cardiomyocyte differentiation
Source: PubMed Central journal article supplement (PMC10349095; doi:10.1038/s41420-023-01548-1), 2023-07-14
Supplement: 41420_2023_1548_MOESM3_ESM.pdf [file 41420_2023_1548_MOESM3_ESM.pdf]

## Co-authors' email responses

### (1) Agreement from Mr. Yang Chen

Dear Prof. Guo,

Thanks for your Email. I agree to these changes of adding two authors to the author lists of manuscript (DDISCOVERY-23-0180R1).

----- 原始邮件 -----

发件人: "郭旭东" <[19504@tongji.edu.cn](mailto:19504@tongji.edu.cn)>;

发件时间: 2023-07-05 11:49

收件人: "825645918" <[825645918@qq.com](mailto:825645918@qq.com)>;

主题: Asking to obtain the agreement about the author addition

Dear Mr. Yang Chen,

This E-mail is asking to obtain your agreement about the additions of the following authors (Mr Jianguo Li and Mr Ke Feng) to the author lists of manuscript (DDISCOVERY-23-0180R1). And you might reply to this email and confirm that you are agree to these changes.

Best wishes,

Xudong Guo

#### Asking to obtain the agreement about the author addition

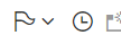

Dear Prof. Guo,

Thanks for your E-mail. I agree to these changes of adding two authors to the author lists of manuscript (DDISCOVERY-23-0180R1).

----- 原始邮件 -----

发件人: "郭旭东" <[19504@tongji.edu.cn](mailto:19504@tongji.edu.cn)>;

发件时间: 2023-07-05 11:49

收件人: "825645918" <[825645918@qq.com](mailto:825645918@qq.com)>;

主题: Asking to obtain the agreement about the author addition

Dear Mr. Yang Chen,

This E-mail is asking to obtain your agreement about the additions of the following authors (Mr Jianguo Li and Mr Ke Feng) to the author lists of manuscript (DDISCOVERY-23-0180R1). And you might reply to this email and confirm that you are agree to these changes.

Best wishes,

Xudong Guo

## (2) Agreement from Dr. Yukang Wu

Dear Prof. Guo,

Thanks for your E-mail. I agree to these changes of adding two authors to the author lists of manuscript (DDISCOVERY-23-0180R1).

Yukang Wu  
20230705

> 2023年7月5日 11:42, 郭旭东 <19504@tongji.edu.cn> 写道:

>

> Dear Dr. Yukang Wu,

> This E-mail is asking to obtain your agreement about the additions of the following authors (Mr Jianguo Li and Mr Ke Feng) to the author lists of manuscript (DDISCOVERY-23-0180R1). And you might reply to this email and confirm that you are agree to these changes.

>

> Best wishes,

> Xudong Guo

"武玉康" <yukang\_wu@163.com> 发送给 "郭旭东" <195... 2023-07-05 11:38:45

Dear Prof. Guo,

Thanks for your E-mail. I agree to these changes of adding two authors to the author lists of manuscript (DDISCOVERY-23-0180R1).

Yukang Wu  
20230705

> 2023年7月5日 11:42, 郭旭东 <19504@tongji.edu.cn> 写道:

>

> Dear Dr. Yukang Wu,

> This E-mail is asking to obtain your agreement about the additions of the following authors (Mr Jianguo Li and Mr Ke Feng) to the author lists of manuscript (DDISCOVERY-23-0180R1). And you might reply to this email and confirm that you are agree to these changes.

>

> Best wishes,

> Xudong Guo

>

>

>

### (3) Agreement from Mr. Jianguo Li

Dear Prof. Guo,

Thanks for your E-mail. I agree to these changes of adding two authors to the author lists of manuscript (DDISCOVERY-23-0180R1).

Best wishes,

Jianguo Li

> -----原始邮件-----

> 发件人: "郭旭东" <19504@tongji.edu.cn>

> 发送时间: 2023-07-05 11:42:49 (星期三)

> 收件人: lijianquo@tongji.edu.cn

> 抄送:

> 主题: Asking to obtain the agreement about the author addition

>

> Dear Mr. Jianguo Li,

> This E-mail is asking to obtain your agreement about the additions of the following authors (Mr Jianguo Li and Mr Ke Feng) to the author lists of manuscript (DDISCOVERY-23-0180R1). And you might reply to this email and confirm that you are agree to these changes.

>

> Best wishes,

> Xudong Guo

#### Asking to obtain the agreement about the author addition

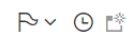

Dear Prof. Guo,  
Thanks for your E-mail. I agree to these changes of adding two authors to the author lists of manuscript (DDISCOVERY-23-0180R1).

Best wishes,  
Jianguo Li

> -----原始邮件-----

> 发件人: "郭旭东" <19504@tongji.edu.cn>

> 发送时间: 2023-07-05 11:42:49 (星期三)

> 收件人: lijianquo@tongji.edu.cn

> 抄送:

> 主题: Asking to obtain the agreement about the author addition

>

> Dear Mr. Jianguo Li,

> This E-mail is asking to obtain your agreement about the additions of the following authors (Mr Jianguo Li and Mr Ke Feng) to the author lists of manuscript (DDISCOVERY-23-0180R1). And you might reply to this email and confirm that you are agree to these changes.

>

> Best wishes,

#### (4) Agreement from Mr. Kai Chen

Dear Prof. Guo,

Thanks for your E-mail. I agree to these changes of adding two authors to the author lists of manuscript (DDISCOVERY-23-0180R1).

Kai Chen

At 2023-07-05 10:44:14, "郭旭东" <[19504@tongji.edu.cn](mailto:19504@tongji.edu.cn)> wrote:

>Dear Mr. Kai Chen,

>This E-mail is asking to obtain your agreement about the additions of the following authors (Mr Jianguo Li and Mr Ke Feng) to the author lists of manuscript (DDISCOVERY-23-0180R1). And you might reply to this email and confirm that you are agree to these changes.

>

>Best wishes,

>Xudong Guo

#### 回复: Asking to obtain the agreement about the author addition

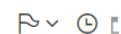

Dear Prof. Guo,

Thanks for your E-mail. I agree to these changes of adding two authors to the author lists of manuscript (DDISCOVERY-23-0180R1).

Kai Chen

At 2023-07-05 10:44:14, "郭旭东" <[19504@tongji.edu.cn](mailto:19504@tongji.edu.cn)> wrote:

>Dear Mr. Kai Chen,

>This E-mail is asking to obtain your agreement about the additions of the following au

>

>Best wishes,

>Xudong Guo

## (5) Agreement from Mr. Wuchan Wang

Dear Prof. Guo,

Thanks for your E-mail. I agree to these changes of adding two authors to the author lists of manuscript (DDISCOVERY-23-0180R1).

Wuchan Wang

> -----原始邮件-----

> 发件人: "郭旭东" <19504@tongji.edu.cn>

> 发送时间: 2023-07-05 11:44:49 (星期三)

> 收件人: wangwuchan2019@tongji.edu.cn

> 抄送:

> 主题: Asking to obtain the agreement about the author addition

>

> Dear Mr. Wuchan Wang,

> This E-mail is asking to obtain your agreement about the additions of the following authors (Mr Jianguo Li and Mr Ke Feng) to the author lists of manuscript (DDISCOVERY-23-0180R1). And you might reply to this email and confirm that you are agree to these changes.

>

> Best wishes,

> Xudong Guo

### Asking to obtain the agreement about the author addition

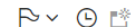

Dear Prof. Guo,

Thanks for your E-mail. I agree to these changes of adding two authors to the author lists of manuscript (DDISCOVERY-23-0180R1).

Wuchan Wang

> -----原始邮件-----

> 发件人: "郭旭东" <19504@tongji.edu.cn>

> 发送时间: 2023-07-05 11:44:49 (星期三)

> 收件人: wangwuchan2019@tongji.edu.cn

> 抄送:

> 主题: Asking to obtain the agreement about the author addition

>

> Dear Mr. Wuchan Wang,

> This E-mail is asking to obtain your agreement about the additions of the following authors (Mr Jianguo Li and Mr Ke Feng) to the author lists of manuscript (DDISCOVERY-23-0180R1). And you might reply to this email and confirm that you are agree to these changes.

>

> Best wishes,

> Xudong Guo

>

>

## (6) Agreement from Miss. Zihui Ye

Dear Prof. Guo,

Thanks for your E-mail. I agree to these changes of adding two authors to the author lists of manuscript (DDISCOVERY-23-0180R1).

Zihui Ye

2023年7月5日 11:45, 郭旭东 <[19504@tongji.edu.cn](mailto:19504@tongji.edu.cn)> 写道:

Dear Zihui Ye,

This E-mail is asking to obtain your agreement about the additions of the following authors (Mr Jianguo Li and Mr Ke Feng) to the author lists of manuscript (DDISCOVERY-23-0180R1). And you might reply to this email and confirm that you are agree to these changes.

Best wishes,  
Xudong Guo

### Asking to obtain the agreement about the author addition

📧 ⌵ ⌚ 🗑

"叶子惠" <[2031513@tongji.edu.cn](mailto:2031513@tongji.edu.cn)> 发送给 "郭旭东" <1...

📧 ⌵ ⌚ 🗑 2023-07-05 11:41:31 ⌵

Dear Prof. Guo,  
Thanks for your E-mail. I agree to these changes of adding two authors to the author lists of manuscript (DDISCOVERY-23-0180R1).

Zihui Ye

2023年7月5日 11:45, 郭旭东 <[19504@tongji.edu.cn](mailto:19504@tongji.edu.cn)> 写道:

Dear Zihui Ye,  
This E-mail is asking to obtain your agreement about the additions of the following authors (Mr Jianguo Li and Mr Ke Feng) to the author lists of manuscript (DDISCOVERY-23-0180R1). And you might reply to this email and confirm that you are agree to these changes.

Best wishes,  
Xudong Guo

-----

## (7) Agreement from Mr. Ke Feng

Dear Prof. Guo,

Thanks for your E-mail. I agree to these changes of adding two authors to the author lists of manuscript (DDISCOVERY-23-0180R1).

----- 原始邮件 -----

发件人: "郭旭东" <[19504@tongji.edu.cn](mailto:19504@tongji.edu.cn)>;  
发送时间: 2023年7月5日(星期三) 中午 11:46  
收件人: "枫叶蓝" <[kefeng\\_bio@foxmail.com](mailto:kefeng_bio@foxmail.com)>;  
主题: Asking to obtain the agreement about the author addition

Dear Mr. Ke Feng,

This E-mail is asking to obtain your agreement about the additions of the following authors (Mr Jianguo Li and Mr Ke Feng) to the author lists of manuscript (DDISCOVERY-23-0180R1). And you might reply to this email and confirm that you are agree to these changes.

Best wishes,  
Xudong Guo

回复: Asking to obtain the agreement about the author addition

📧 ⌵ 🕒 🗑️

"枫叶蓝" <[kefeng\\_bio@foxmail.com](mailto:kefeng_bio@foxmail.com)> 发送给 "郭旭东" ...

📧 🕒 🗑️ 2023-07-05 12:42:51 ⌵

Dear Prof. Guo,  
Thanks for your E-mail. I agree to these changes of adding two authors to the author lists of manuscript (DDISCOVERY-23-0180R1).

----- 原始邮件 -----

发件人: "郭旭东" <[19504@tongji.edu.cn](mailto:19504@tongji.edu.cn)>;  
发送时间: 2023年7月5日(星期三) 中午11:46  
收件人: "枫叶蓝" <[kefeng\\_bio@foxmail.com](mailto:kefeng_bio@foxmail.com)>;  
主题: Asking to obtain the agreement about the author addition

Dear Mr. Ke Feng,

This E-mail is asking to obtain your agreement about the additions of the following authors (Mr Jianguo Li and Mr Ke Feng) to the author lists of manuscript (DDISCOVERY-23-0180R1). And you might reply to this email and confirm that you are agree to these changes.

Best wishes,  
Xudong Guo

## (8) Agreement from Dr. Yiwei Yang

Dear Prof. Guo,

Thanks for your E-mail. I agree to these changes of adding two authors to the author lists of manuscript (DDISCOVERY-23-0180R1).

Best wishes,

Yiwei Yang

----- 原始邮件 -----

发件人: 郭旭东 <[19504@tongji.edu.cn](mailto:19504@tongji.edu.cn)>

日期: 2023年7月5日周三 11:46

收件人: [tinyslark@163.com](mailto:tinyslark@163.com)

主题: Asking to obtain the agreement about the author addition

Dear Dr. Yiwei Yang,

This E-mail is asking to obtain your agreement about the additions of the following authors (Mr Jianguo Li and Mr Ke Feng) to the author lists of manuscript (DDISCOVERY-23-0180R1). And you might reply to this email and confirm that you are agree to these changes.

Best wishes,

Xudong Guo

### 回复: Asking to obtain the agreement about the author addition

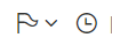

Dear Prof. Guo,

Thanks for your E-mail. I agree to these changes of adding two authors to the author lists of manuscript (DDISCOVERY-23-0180R1).

Best wishes,

Yiwei Yang

----- 原始邮件 -----

发件人: 郭旭东 <[19504@tongji.edu.cn](mailto:19504@tongji.edu.cn)>

日期: 2023年7月5日周三 11:46

收件人: [tinyslark@163.com](mailto:tinyslark@163.com)

主题: Asking to obtain the agreement about the author addition

Dear Dr. Yiwei Yang,

This E-mail is asking to obtain your agreement about the additions of the following authors (Mr Jianguo Li and Mr Ke Feng) to the author lists of manuscript (DDISCOVERY-23-0180R1). And you might reply to this email and confirm that you are agree to these changes.

Best wishes,

Xudong Guo



## (9) Agreement from Dr. Yanxin Xu

Hi Prof. Guo,

Thanks for your email. I agree to these change of adding two authors to the author list of manuscript (DDISCOVERY-23-0180R1).

Best,  
Yanxin

---

**From:** [郭旭东](#)

**Date:** 2023-07-04 22:47

**To:** [xu53151977](#)

**Subject:** Asking to obtain the agreement about the author addition

Dear Dr. Yanxin Xu,

This E-mail is asking to obtain your agreement about the additions of the following authors (Mr Jianguo Li and Mr Ke Feng) to the author lists of manuscript (DDISCOVERY-23-0180R1). And you might reply to this email and confirm that you are agree to these changes.

Best wishes,  
Xudong Guo

**Asking to obtain the agreement about the author addition**

📧 ⌵ ☹ 🗑

Hi Prof. Guo,

Thanks for your email. I agree to these change of adding two authors to the author list of manuscript (DDISCOVERY-23-0180R1).

Best,  
Yanxin

---

**From:** [郭旭东](#)

**Date:** 2023-07-04 22:47

**To:** [xu53151977](#)

**Subject:** Asking to obtain the agreement about the author addition

Dear Dr. Yanxin Xu,

This E-mail is asking to obtain your agreement about the additions of the following authors (Mr Jianguo Li and Mr Ke Feng) to the author lists of manuscript (DDISCOVERY-23-0180R1). And you might reply to this email and confirm that you are agree to these

## (10) Agreement from Prof. Jihong Kang

Dear Prof. Guo,

Thanks for your E-mail. I agree to the addition of two authors to the author lists of manuscript (DDISCOVERY-23-0180R1).

Jihong Kang

> -----原始邮件-----

> 发件人: "郭旭东" <19504@tongji.edu.cn>

> 发送时间: 2023-07-05 11:47:35 (星期三)

> 收件人: "康九红老师" <jhkang@tongji.edu.cn>

> 抄送:

> 主题: Asking to obtain the agreement about the author addition

>

> Dear Prof. Jihong Kang,

> This E-mail is asking to obtain your agreement about the additions of the following authors (Mr Jianguo Li and Mr Ke Feng) to the author lists of manuscript (DDISCOVERY-23-0180R1). And you might reply to this email and confirm that you are agree to these changes.

>

> Best wishes,

> Xudong Guo

**Re: Asking to obtain the agreement about the author addition**

    

Dear Prof. Guo,

Thanks for your E-mail. I agree to the addition of two authors to the author lists of manuscript (DDISCOVERY-23-0180R1).

Jihong Kang

> -----原始邮件-----

> 发件人: "郭旭东" <19504@tongji.edu.cn>

> 发送时间: 2023-07-05 11:47:35 (星期三)

> 收件人: "康九红老师" <jhkang@tongji.edu.cn>

> 抄送:

> 主题: Asking to obtain the agreement about the author addition

>

> Dear Prof. Jihong Kang,

> This E-mail is asking to obtain your agreement about the additions of the following authors (Mr Jianguo Li and Mr Ke Feng) to the author lists of manuscript (DDISCOVERY-23-0180R1). And you might reply to this email and confirm that you are agree to these changes.

>

> Best wishes,

> Xudong Guo

>
